# Supplementary material
Source: Springer Nature journal article supplement (https://www.springermedizin.de/resource/supplementary/13058_2006_1574_MOESM2_ESM.pdf/9699428)
Supplement: MOESM2 [file 9699428]

|                               | Error Rate   | Gene Set Size    | Predictor Size | Training Error | PAM Cross-Validation Error |
|-------------------------------|--------------|------------------|----------------|----------------|----------------------------|
| Menopausal Status - SAM       | 0.375 ± 0.25 | 83.25 ± 43.77    | 12.75 ± 4.19   | 0.16 ± 0.03    | 0.40 ± 0.04                |
| Menopausal Status - Limma     | 0.5 ± 0      | 9.55 ± 3.14      | 6.91 ± 2.70    | 0.31 ± 0.04    | 0.47 ± 0.05                |
| ER - Limma                    | 0.5 ± 0.35   | 2651.78 ± 100.84 | 122 ± 105.15   | 0.038 ± 0.021  | 0.48 ± 0.08                |
| PR - Limma                    | 0.5 ± 0.24   | 910.4 ± 135.33   | 34 ± 27.68     | 0.079 ± 0.04   | 0.47 ± 0.17                |
| HER2 - SAM                    | 0.5 ± 0      | 65.33 ± 63.32    | 20.67 ± 8.08   | 0.13 ± 0.11    | 0.24 ± 0.05                |
| HER2 - Limma                  | 0.5 ± 0.32   | 54 ± 30.79       | 30.83 ± 13.56  | 0 ± 0          | 0.41 ± 0.16                |
| Grade - Limma                 | 0.4 ± 0.21   | 286.3 ± 49.52    | 78.4 ± 57.48   | 0.042 ± 0.028  | 0.39 ± 0.09                |
| Adjacent vs Reduction - Limma | 0.42 ± 0.20  | 7664.83 ± 27.82  | 28.5 ± 6.09    | 0 ± 0          | 0.18 ± 0.07                |

Supplementary Table S2:
